# Supplementary material for: A nanosensor made of sulfur–nitrogen co-doped carbon dots for “off–on” sensing of hypochlorous acid and Zn(ii) and its bioimaging properties
Source: Royal Society of Chemistry journal article supplement (doi:10.1039/c8nj03159b), 2018-01-01
Supplement: c8nj03159b1.pdf [file c8nj03159b1.pdf]

## Electronic Supplementary Information

### Nanosensor of sulfur-nitrogen co-doped carbon dots for “off-on” sensing of hypochlorous acid and Zn(II) and its bioimaging

Zhengwei Zhang ‡<sup>a</sup>, Ke Pei ‡<sup>b</sup>, Qiulian Yang <sup>a</sup>, Jiayu Dong <sup>a</sup>, Zhengyu Yan <sup>a\*</sup> and Jianqiu Chen <sup>a\*</sup>

<sup>a</sup> School of Science, China Pharmaceutical University, Nanjing 210009, China.

<sup>b</sup> Institute of Pharmaceutical and Food Engineering, Shanxi University of Chinese Medicine, Jinzhong 030619, China.

\*Corresponding author:

Tel.: + 86 25 86185150, Fax: + 86 25 86185150.

E-mail address: cjqercarbon@yeah.net (J. Chen); yanzhengyujiang@163.com (Z. Yan).

‡ Zhengwei Zhang and Ke Pei have contributed equally to this work.

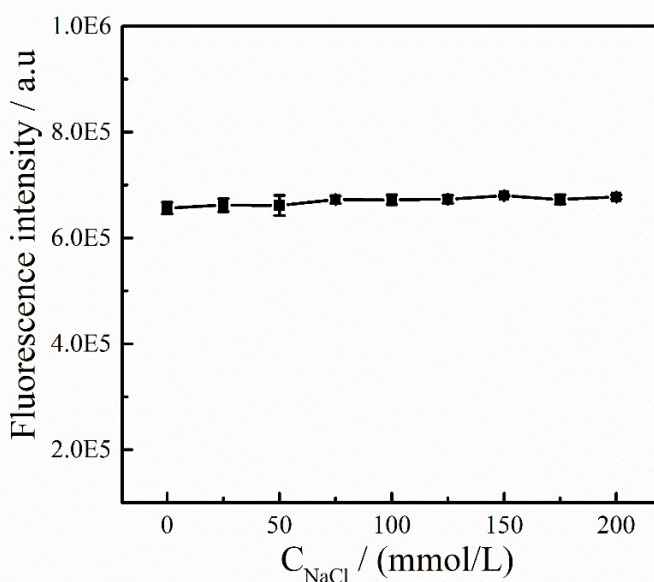

**Fig. S1** Effect of ionic strengths on the fluorescence intensity of SNCDs by various concentrations of NaCl in aqueous solution.

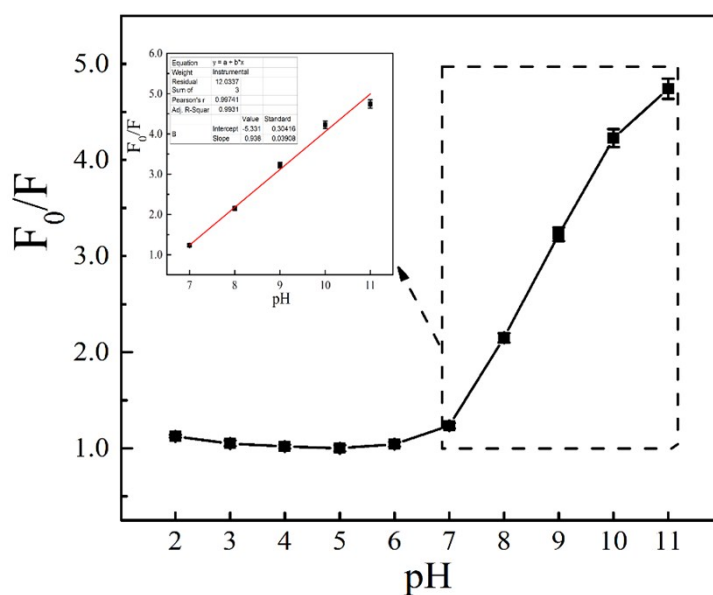

**Fig. S2** Relationships between the quenching efficiency and pH value of SNCDs solution, inset: the linear response range of the pH sensor.

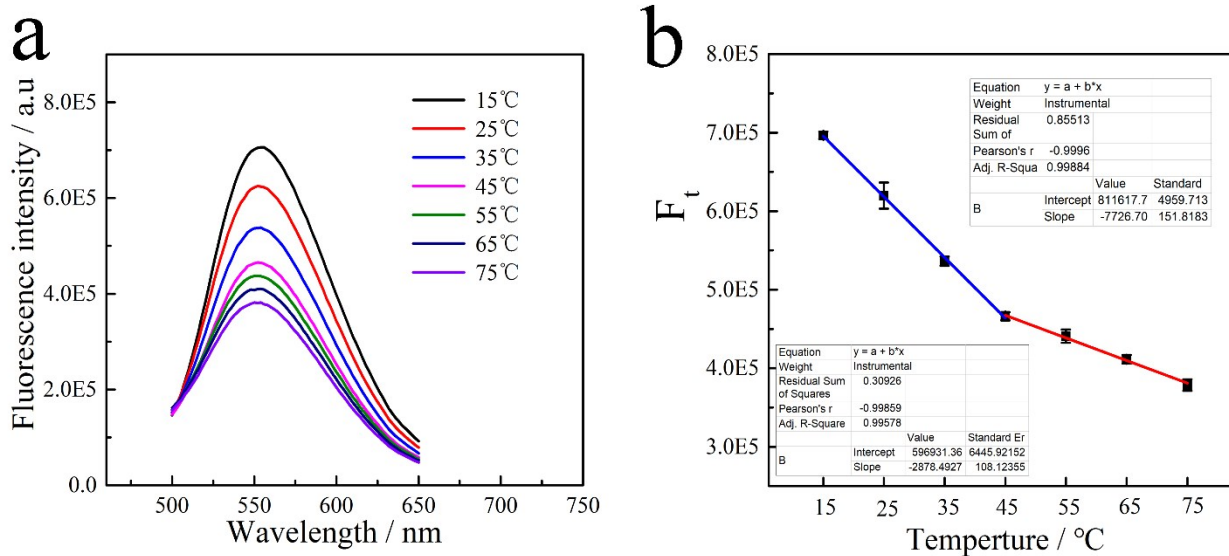

**Fig. S3** Fluorescence thermosensitivity of SNCDs: (a) Fluorescence emission spectra measured in the range of 15-75 °C (from top to bottom) when excited at 420 nm; (b) The corresponding linear regression of the temperature versus  $F_t$ .

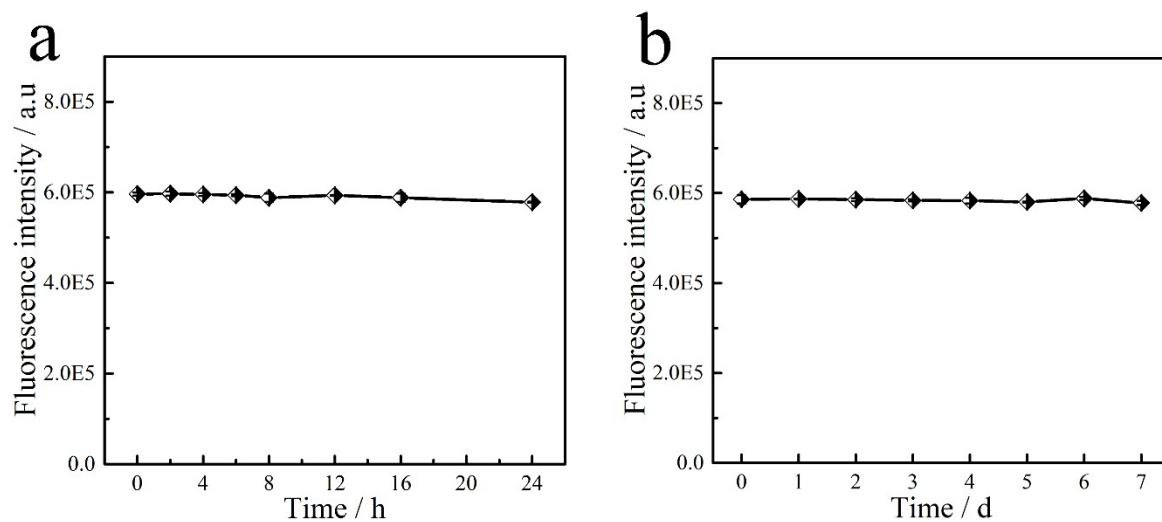

**Fig. S4** Effects of time intervals of irradiation with a 3000 lux light (a) and storage time (b) on the FL intensity of SNCDs.

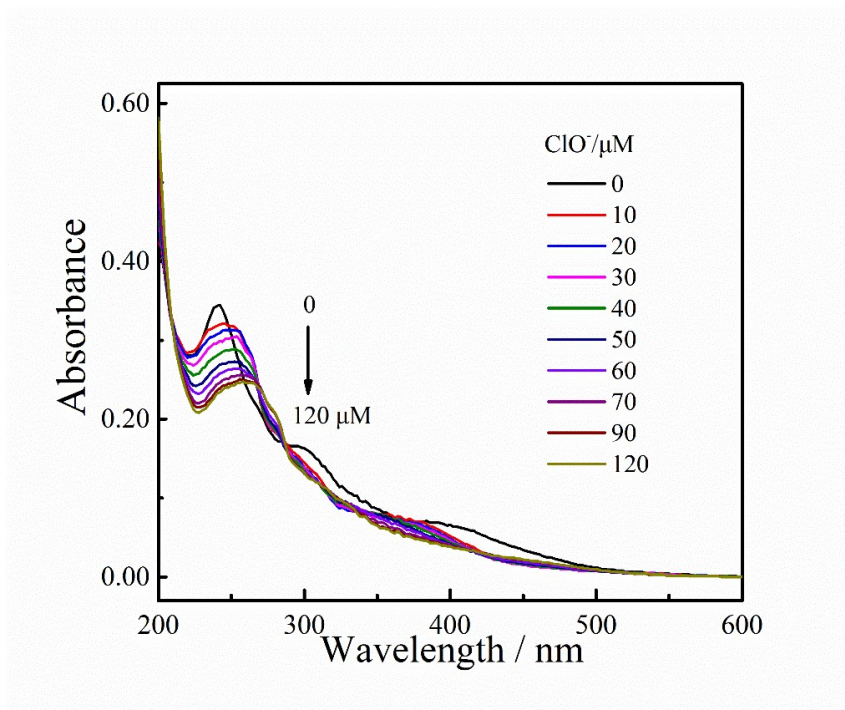

**Fig. S5** UV-vis absorbance spectra of SNCDs ( $1.00 \mu\text{g}\cdot\text{mL}^{-1}$ ) upon addition of different concentrations of  $\text{ClO}^-$  from 0 to 120  $\mu\text{M}$ .

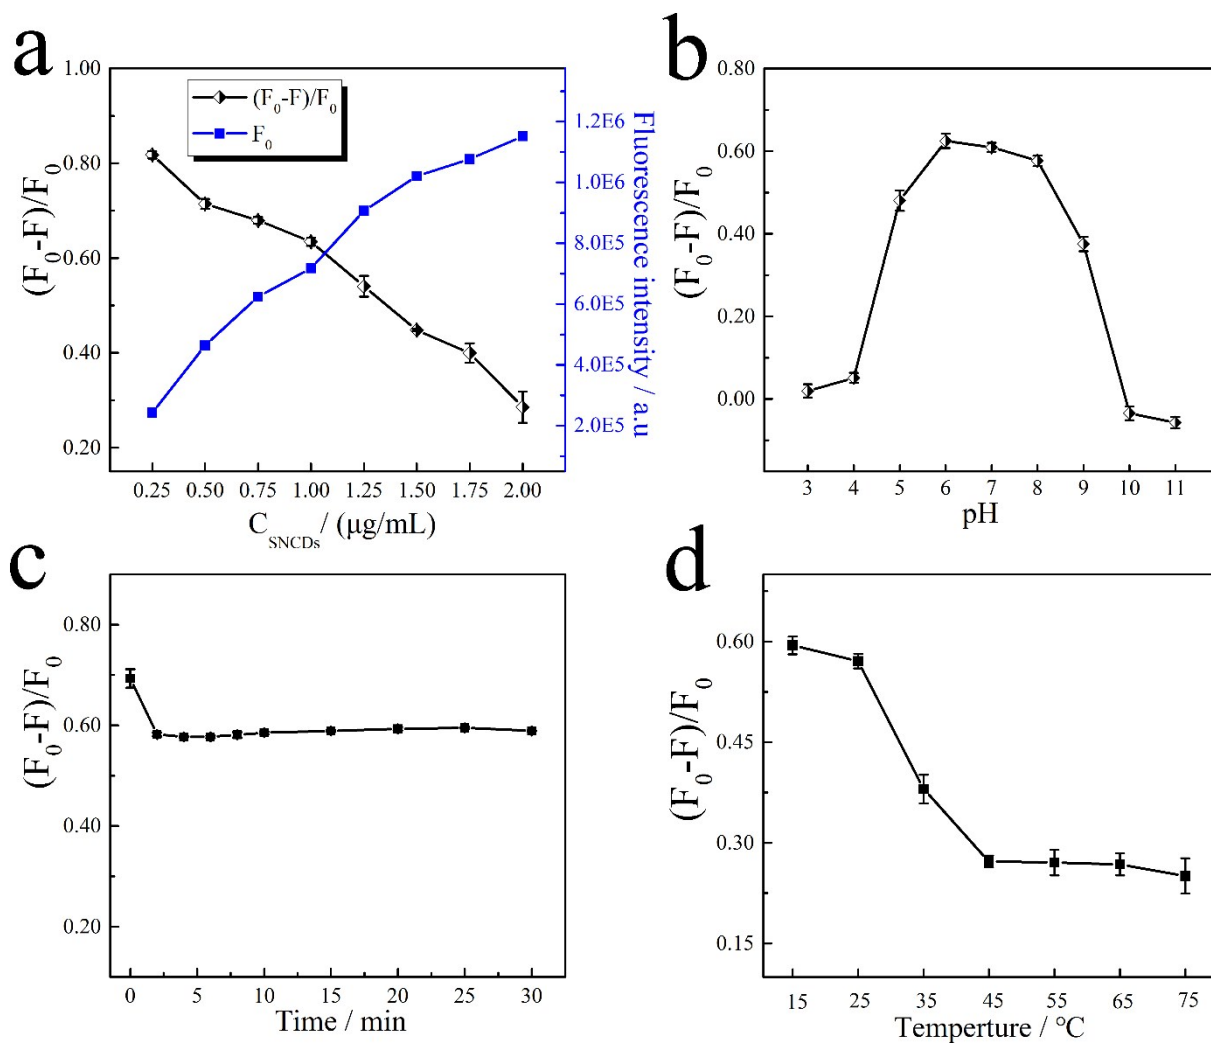

**Fig. S6** Fluorescence “turn-off” process: (a) Effects of different SNCDs concentrations on the FL intensities and fluorescence quenching rates (left to right: 0.25, 0.50, 0.75, 1.00, 1.25, 1.50, 1.75 and 2.00  $\mu\text{g}\cdot\text{mL}^{-1}$ ) after addition of HOCl; (b) Effects of pH values on the fluorescence quenching rates (1.00  $\mu\text{g}\cdot\text{mL}^{-1}$  of SNCDs upon addition of 2.50  $\mu\text{M}$  of HOCl); (c) Effects of incubation time on the fluorescence quenching rates (1.00  $\mu\text{g}\cdot\text{mL}^{-1}$  of SNCDs upon addition of 2.50  $\mu\text{M}$  of HOCl); (d) Effects of incubation temperature on the fluorescence quenching rates (1.00  $\mu\text{g}\cdot\text{mL}^{-1}$  of SNCDs upon addition of 2.50  $\mu\text{M}$  of HOCl).

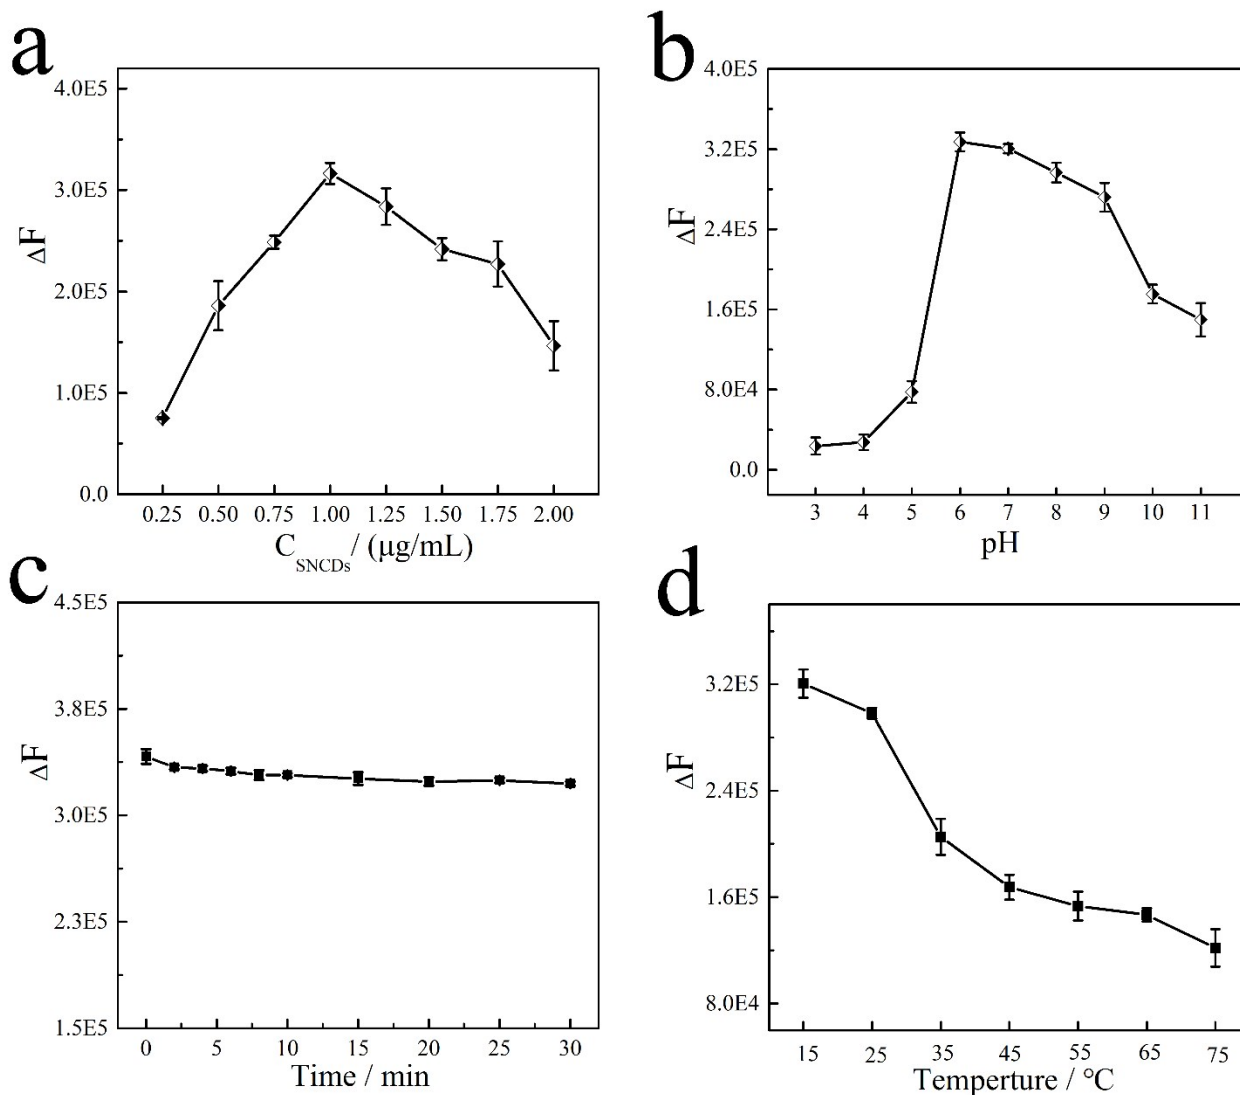

**Fig. S7** Fluorescence “turn-on” process: (a) Effects of different SNCDs concentrations on the fluorescence recovery rates (left to right: 0.25, 0.50, 0.75, 1.00, 1.25, 1.50, 1.75 and 2.00  $\mu\text{g}\cdot\text{mL}^{-1}$ ) after addition of  $\text{Zn}^{2+}$ ; (b) Effects of pH values on the fluorescence recovery rates (1.00  $\mu\text{g}\cdot\text{mL}^{-1}$  of SNCDs and 2.50  $\mu\text{M}$  of HOCl upon addition of 1.00  $\mu\text{g}\cdot\text{mL}^{-1}$  of  $\text{Zn}^{2+}$ ); (c) Effects of incubation time on the fluorescence recovery rates (1.00  $\mu\text{g}\cdot\text{mL}^{-1}$  of SNCDs and 2.50  $\mu\text{M}$  of HOCl upon addition of 1.00  $\mu\text{g}\cdot\text{mL}^{-1}$  of  $\text{Zn}^{2+}$ ); (d) Effects of incubation temperature on the fluorescence recovery rates (1.00  $\mu\text{g}\cdot\text{mL}^{-1}$  of SNCDs and 2.50  $\mu\text{M}$  of HOCl upon addition of 1.00  $\mu\text{g}\cdot\text{mL}^{-1}$  of  $\text{Zn}^{2+}$ ).
